# Supplementary material
Source: PubMed Central journal article supplement (PMC6642851)
Supplement: NIHMS1012761-supplement-Model_Parameters_and_Equation_Derivations.pdf [file NIHMS1012761-supplement-Model_Parameters_and_Equation_Derivations.pdf]

## Supplementary Materials

### A. Simplified Granule Cell Model Parameters

TABLE I  
PARAMETERS FOR SIMPLIFIED GRANULE CELL MODEL

| Mechanism                                                      | Soma    | GCL      | Inner Third | Middle Third | OuterThird |
|----------------------------------------------------------------|---------|----------|-------------|--------------|------------|
| $C_m$ ( $\mu\text{m}/\text{cm}^2$ )                            | 9.8     | 17.0     | 39.96       | 65.07        | 44.79      |
| Ra ( $\Omega\text{-cm}$ )                                      | 410     | 293.7    | 380.1       | 222.6        | 90.37      |
| Sodium ( $\text{S}/\text{cm}^2$ )                              | 0.84    | 0.2186   | 0.2319      | 0.2324       | 0.0        |
| Slow delayed rectifier $\text{K}^+$ ( $\text{S}/\text{cm}^2$ ) | 6.0e-3  | 1.041e-2 | 1.529e-2    | 2.490e-2     | 2.285e-2   |
| Fast delayed rectifier $\text{K}^+$ ( $\text{S}/\text{cm}^2$ ) | 3.6e-2  | 6.94e-3  | 1.019e-2    | 4.150e-3     | 2.856e-3   |
| A-type $\text{K}^+$ ( $\text{S}/\text{cm}^2$ )                 | 9.0e-3  | -        | -           | -            | -          |
| L-type $\text{Ca}^{2+}$ ( $\text{S}/\text{cm}^2$ )             | 2.5e-3  | 1.301e-2 | 1.911e-2    | 2.075e-3     | 0.0        |
| N-type $\text{Ca}^{2+}$ ( $\text{S}/\text{cm}^2$ )             | 7.35e-4 | 3.828e-3 | 1.874e-3    | 3.051e-3     | 2.100e-3   |
| T-type $\text{Ca}^{2+}$ ( $\text{S}/\text{cm}^2$ )             | 7.4e-5  | 1.301e-4 | 6.370e-4    | 2.075e-3     | 2.856e-3   |
| Ca-dependent $\text{K}^+$ ( $\text{S}/\text{cm}^2$ )           | 6.0e-3  | 6.940e-4 | 5.097e-4    | 0.0          | 0.0        |
| Ca- and V-dependent $\text{K}^+$ ( $\text{S}/\text{cm}^2$ )    | 7.0e-4  | 2.082e-4 | 5.097e-4    | 1.992e-3     | 1.371e-3   |
| Leak ( $\text{S}/\text{cm}^2$ )                                | 2.9e-4  | 5.034e-4 | 1.165e-3    | 1.896e-3     | 1.305e-3   |
| Tau for decay of intracell. $\text{Ca}^{2+}$ (ms)              | 10.0    | 10.0     | 10.0        | 10.0         | 10.0       |
| Steady-state intracell. $\text{Ca}^{2+}$ (mM)                  | 5.0e-6  | 5.0e-6   | 5.0e-6      | 5.0e-6       | 5.0e-6     |

### B. Recursive Form for Legendre Polynomials to Represent Rate Maps

Recursive formulas for computing the Legendre polynomials and their first and second derivatives were obtained by taking the derivative of the generating function with respect to  $t$  and then taking the derivatives with respect to  $x$ . The rate maps were represented by a two-dimensional Legendre polynomial of order 16.

Generating function

$$g(t, x) = \frac{1}{\sqrt{1-2xt+t^2}} = \sum_{j=0}^{\infty} P_j(x)t^j,$$

where  $P_j(x)$  denotes the Legendre polynomial of order  $j$  evaluated at  $x$ .

Recursive form of the Legendre polynomial

$$P_{j+1} = \frac{(2j+1)xP_j - jP_{j-1}}{j+1}$$

Recursive form of the first derivative of the Legendre polynomial

$$P'_j = \frac{jxP_j - jP_{j-1}}{x^2 - 1}$$

Recursive form of the second derivative of the Legendre polynomial

$$P''_j = \frac{jP_j + x(j-2)P'_j - jP'_j}{x^2 - 1}$$

### C. Lower Bound of Mutual Information

The derivation of the lower bound of mutual information is fully described in [1]. A summary can be found below. The derivation begins with the data processing inequality

$$I[x; r] \geq I[x; \hat{x}(r)] = H[x] - H[x|\hat{x}]$$

where  $H[x]$  represents the entropy of the prior stimulus, e.g., rat position, and  $H[x|r]$  represents the noise entropy, or the average residual entropy in  $x$  conditioned on the spiking activity  $r$ . Mutual information is represented by  $I[x; r]$ , and  $I[x; \hat{x}(r)]$  denotes the lower bound of the mutual information. Finally,  $H[x|\hat{x}]$  is the average residual entropy in  $x$  conditioned on the estimate for  $x$ , denoted by  $\hat{x}$ .

The entropy for the rat position was computed using the formula detailed by Barbieri et al., 2004 [37] as follows:

$$H[x] = \frac{1}{2} \log_2 [(2\pi e)^2 |W_\varepsilon|]$$

where  $W_\varepsilon$  is the covariance matrix from the autoregressive model of the rat trajectory. The residual entropy was calculated the formula described by Pillow et al., 2000 [39]:

$$H[x|\hat{x}] = \frac{1}{2} \log_2 |E[r \cdot r^T]| + \frac{1}{2} \log_2 (2\pi e).$$

In this formulation,  $r$  represents the residual of the estimator as  $r = x - \hat{x}$ , and  $E[r \cdot r^T]$  represents the covariance of the residuals. The final lower bound for mutual information can then be expressed as

$$I[x; r] \geq \frac{1}{2} [\log_2 [(2\pi e)^2 |W_\varepsilon|] - (\log_2 |E[r \cdot r^T]| + \log_2 (2\pi e))].$$

#### D. References

- [1] J. W. Pillow, Y. Ahmadian, and L. Paninski, "Model-Based Decoding, Information Estimation, and Change-Point Detection Techniques for Multineuron Spike Trains," *Neural Comput.*, vol. 23, no. 1, pp. 1–45, Oct. 2010.
